# Supplementary material for: Use of Bao Gui capsule in treatment of a polycystic ovary syndrome rat model
Source: PubMed Central journal article supplement — Mol Med Rep. 2020 Jan 20;21(3):1461–70. doi: 10.3892/mmr.2020.10953 (PMC7002974; doi:10.3892/mmr.2020.10953), 2020-01-20
Supplement: Supplementary_Data.pdf [file Supplementary_Data.pdf]

Figure S1. Effects of BGC on serum concentrations of E<sub>2</sub>. Data are expressed as the mean ± standard deviation (n=9). \*P<0.05 vs. Control group. #P<0.05 vs. Model group. ▲P<0.05 vs. BGC-H group. FSH, follicle-stimulating hormone; BGC, Bao Gui capsule; BGC-L, low dose; BGC-H, high dose; E<sub>2</sub>, estradiol.

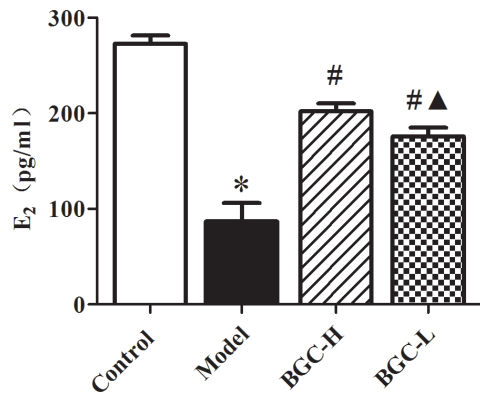

Table SI. Elisa kits.

| Name           | Supplier name                               | Catalogue number |
|----------------|---------------------------------------------|------------------|
| FSH            | BIOSS                                       | BSK00462         |
| LH             | Shibayagi Co., Ltd.                         | AKRLH-010        |
| E <sub>2</sub> | LDN                                         | FR E-2000        |
| T              | LDN                                         | AR E-8000        |
| Insulin        | Shibayagi Co., Ltd.                         | AKRIN-010RU      |
| Leptin         | RayBiotech                                  | ELR-Leptin-1     |
| IL-1 $\beta$   | BioVision, Inc.                             | K4796-100        |
| IL-6           | Invitrogen (Thermo Fisher Scientific, Inc.) | BMS625           |
| TNF- $\alpha$  | BioTNT                                      | A1010A0320       |
